# Supplementary material for: In Vitro Efficacy of Antibiotic Combinations with Carbapenems and Other Agents against Anaerobic Bacteria
Source: MDPI journal article supplement (doi:10.3390/antibiotics11030292), 2022-02-22
Supplement: s1 [file s1]

## Supplementary Appendix

This appendix has been provided by the authors to give readers additional information about their work.

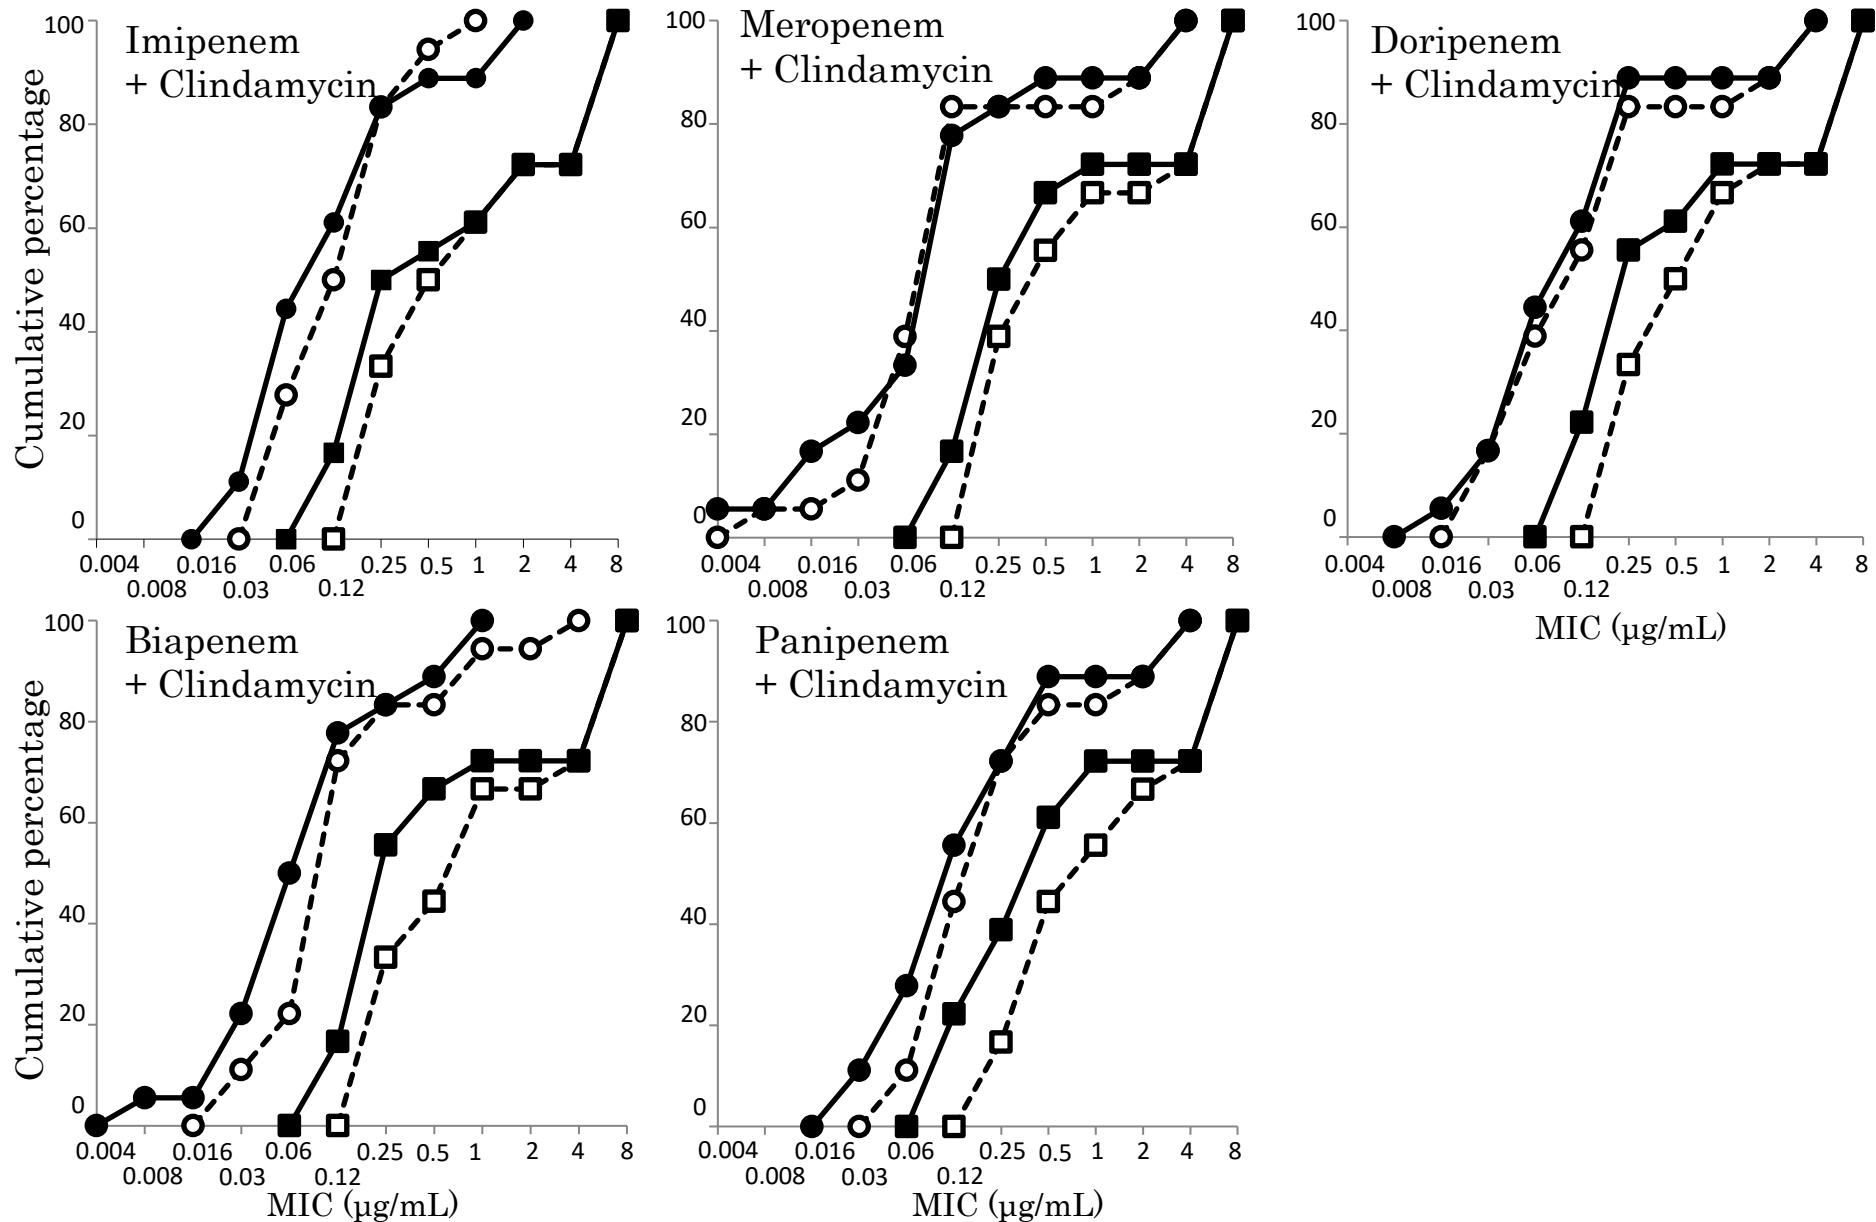

**Figure S1. (A) Antibacterial activity of Carbapenems, Clindamycin and combination against *B.fragilis***

Open circle; MIC of Carbapenems, open square; MIC of Clindamycin, closed circle; MIC of Carbapenems combined with Clindamycin, closed square; MIC of Clindamycin combined with Carbapenems.

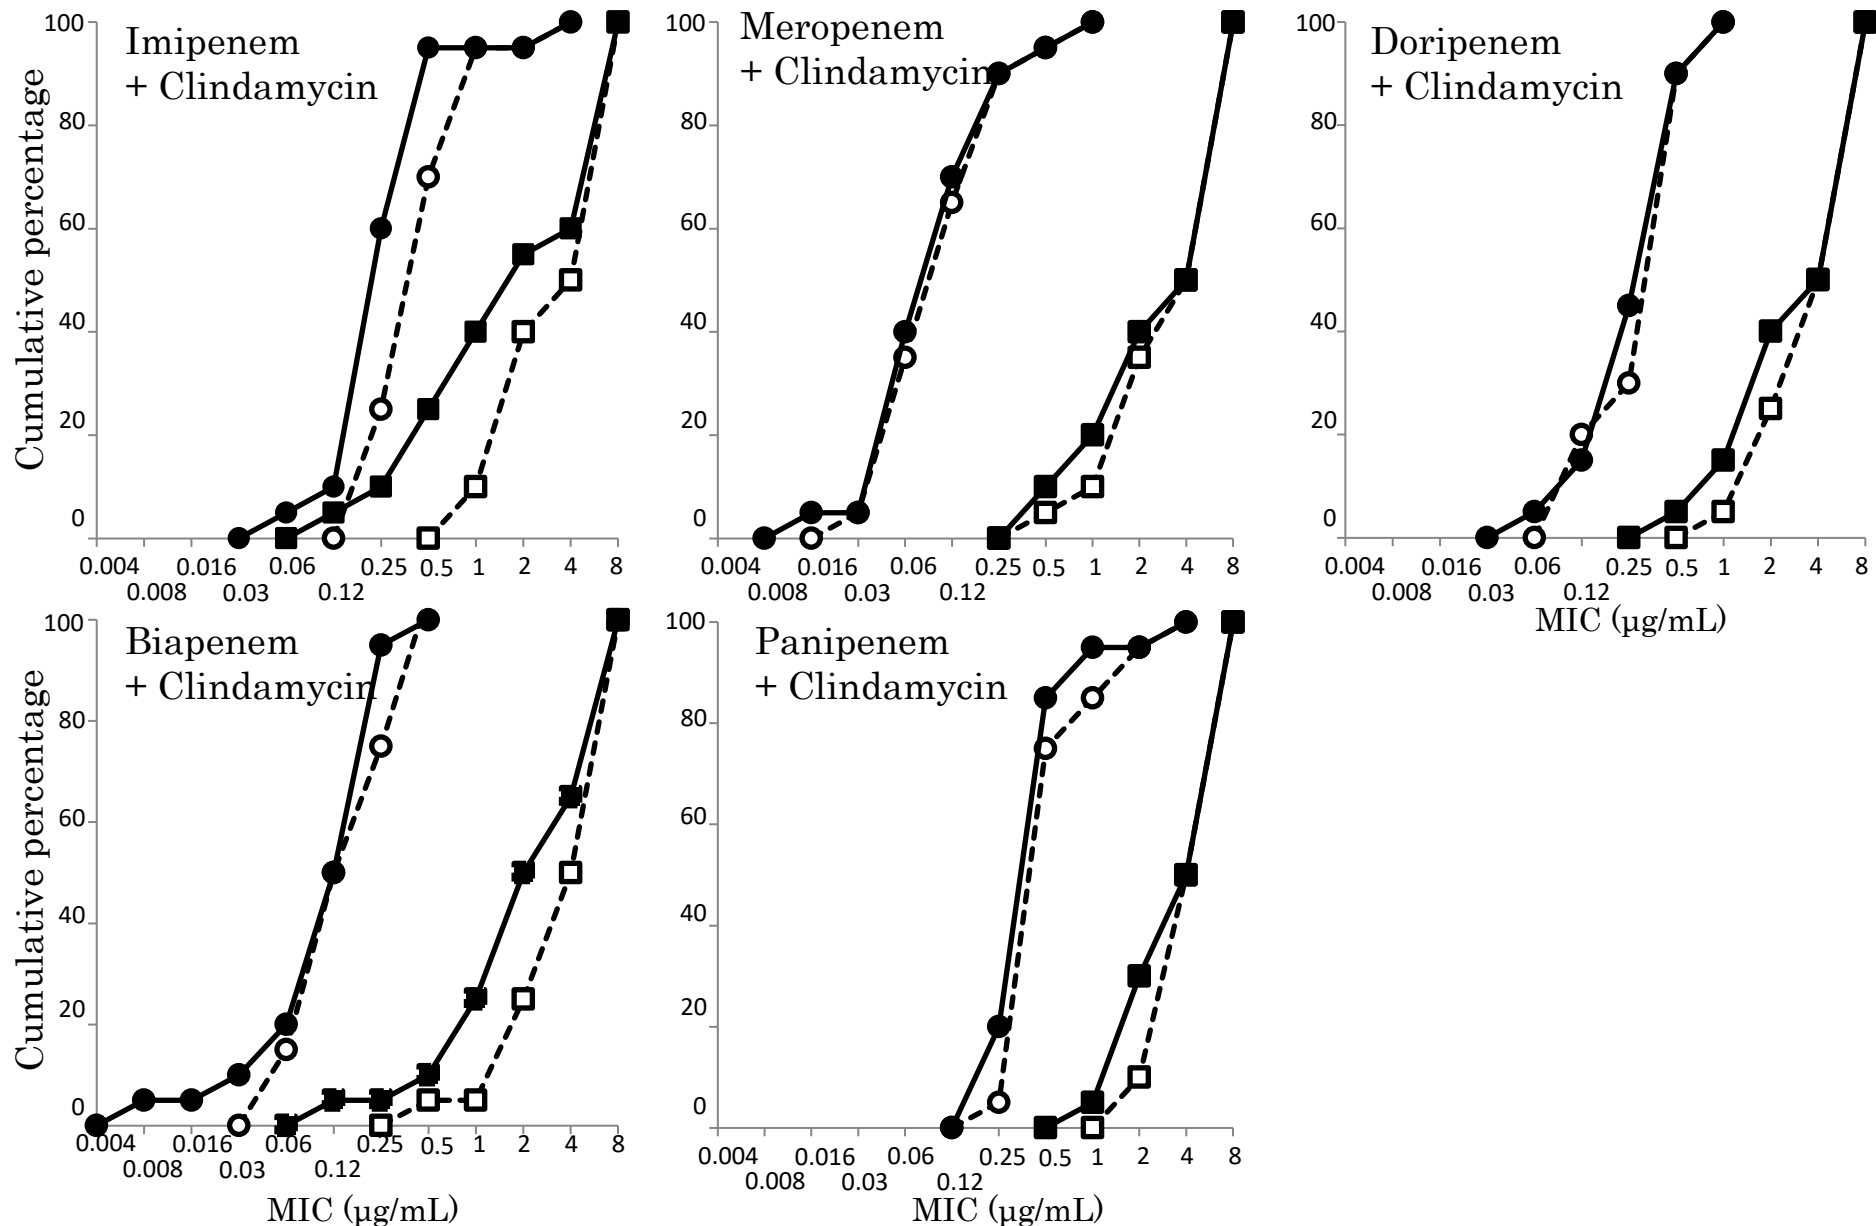

**Figure S1. (B) Antibacterial activity of Carbapenems, Clindamycin and combination against *B.thetaiotaomicron***

Open circle; MIC of Carbapenems, open square; MIC of Clindamycin, closed circle; MIC of Carbapenems combined with Clindamycin, closed square; MIC of Clindamycin combined with Carbapenems.

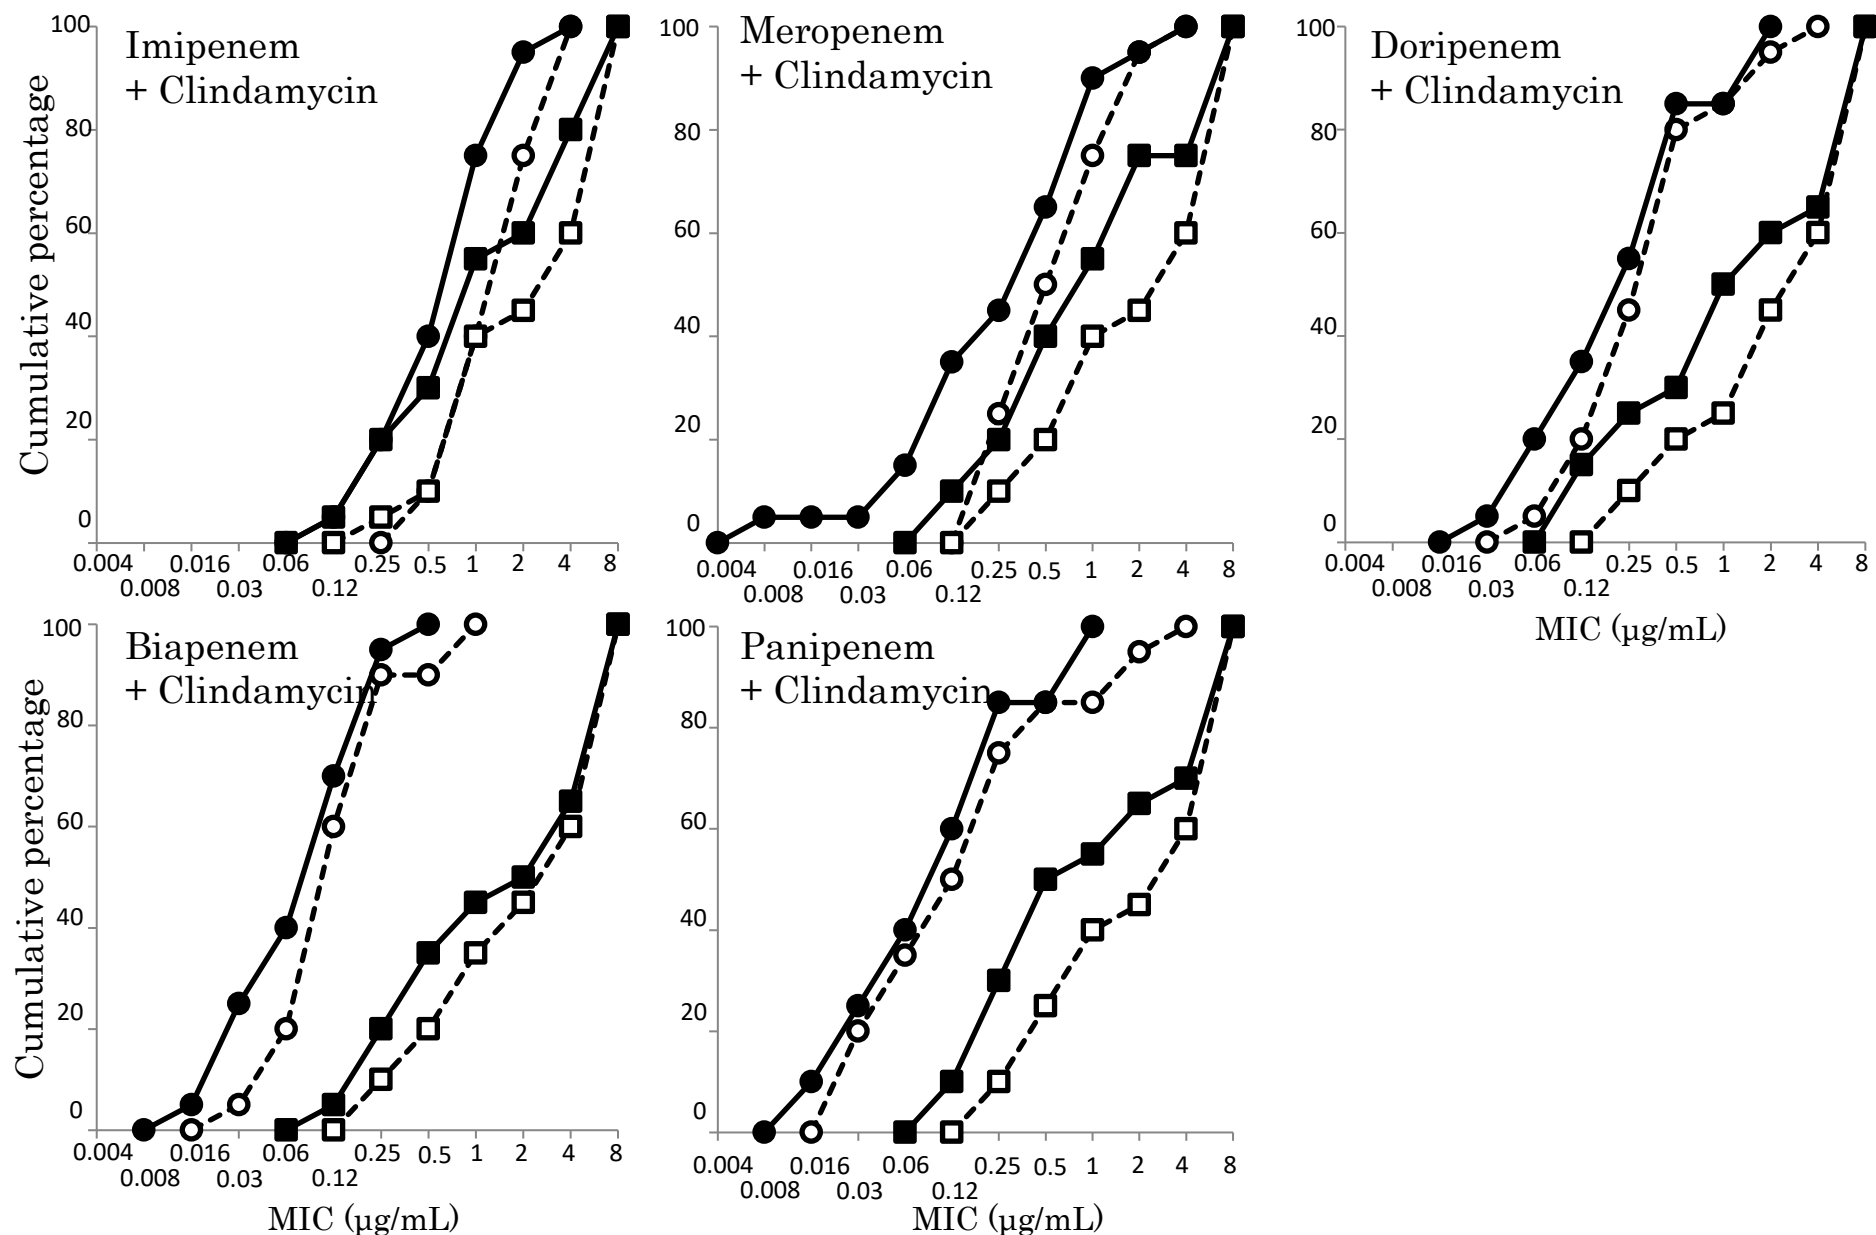

**Figure S1. (C) Antibacterial activity of Carbapenems, Clindamycin and combination against *P. distasonis***

Open circle; MIC of Carbapenems, open square; MIC of Clindamycin, closed circle; MIC of Carbapenems combined with Clindamycin, closed square; MIC of Clindamycin combined with Carbapenems.

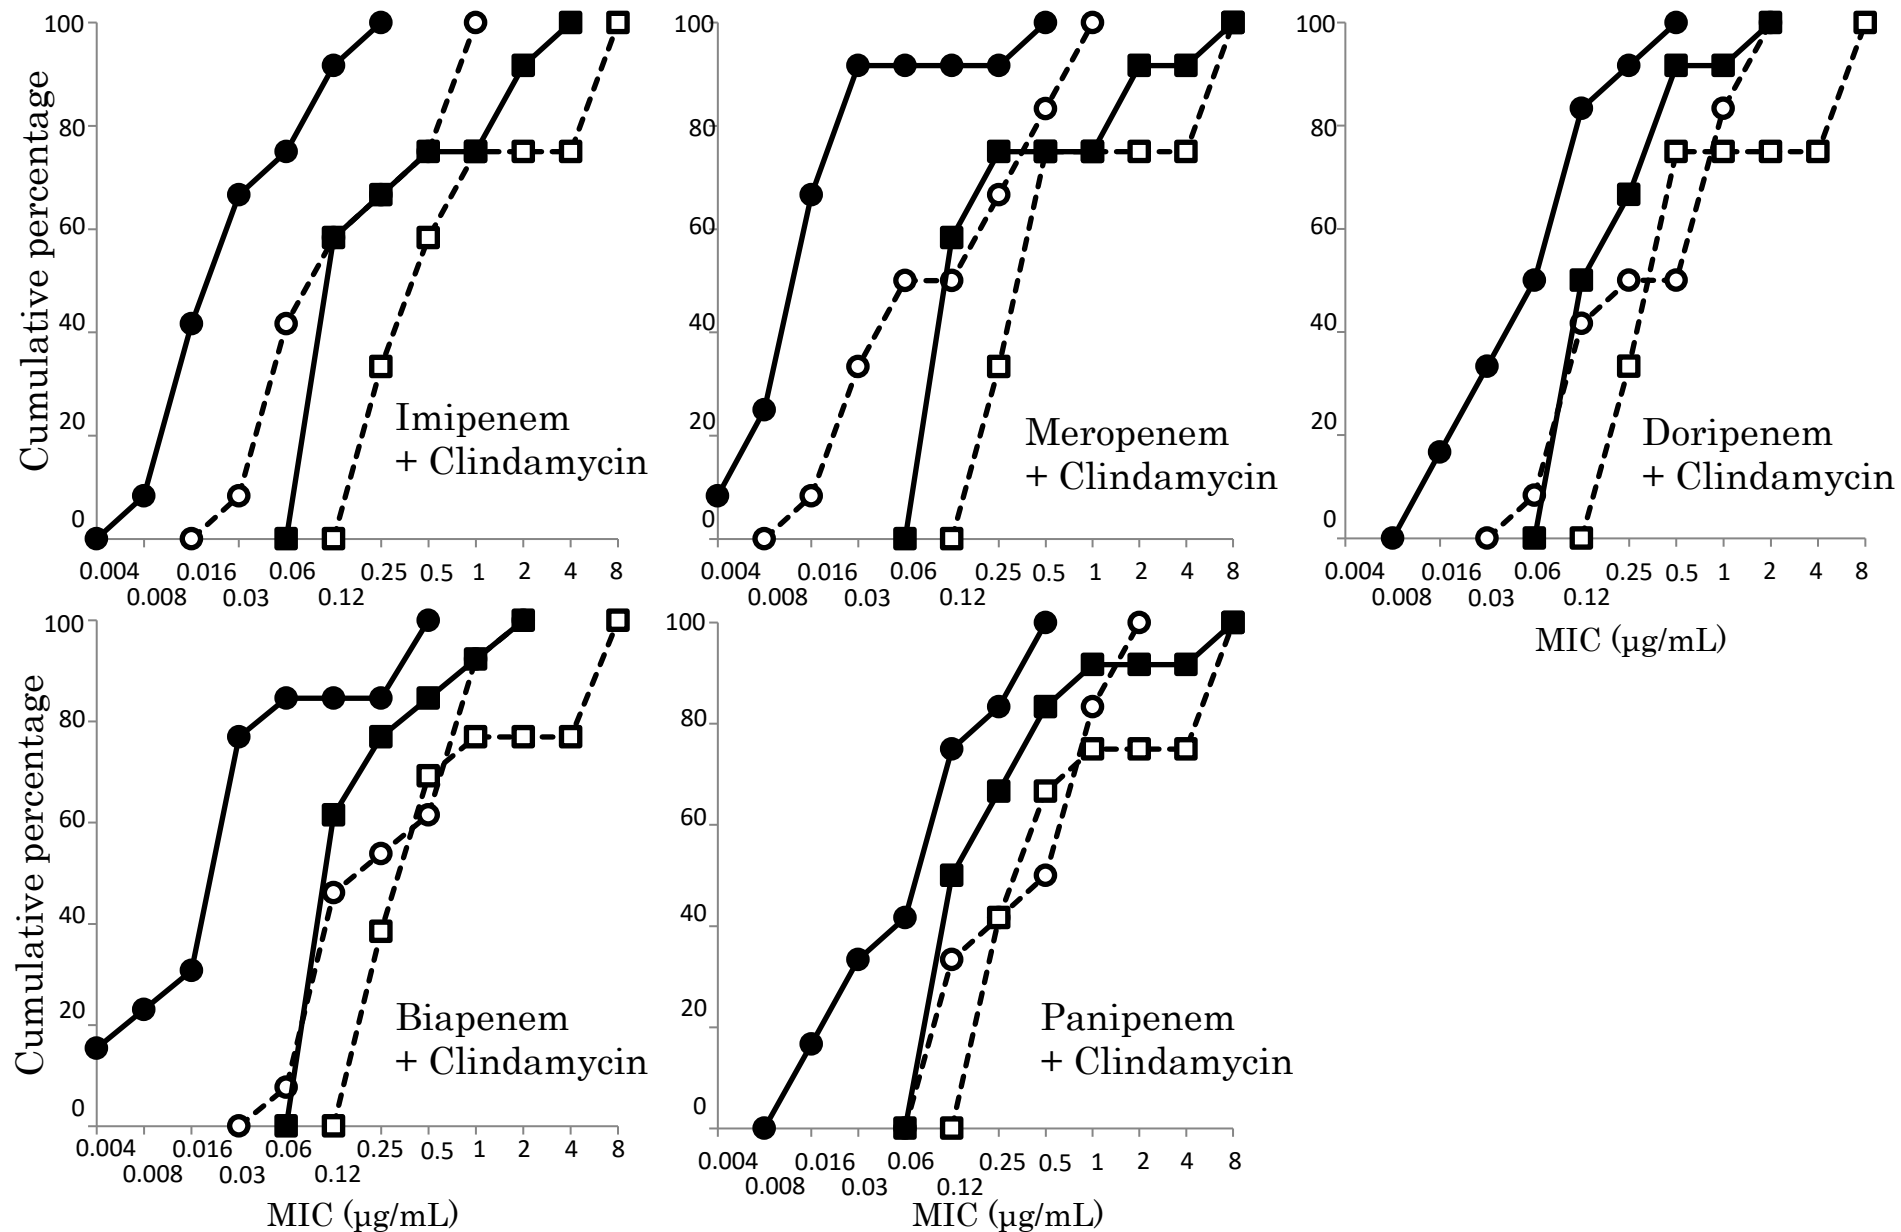

**Figure S1. (D) Antibacterial activity of Carbapenems, Clindamycin and combination against *P. anaerobius***

Open circle; MIC of Carbapenems, open square; MIC of Clindamycin, closed circle; MIC of Carbapenems combined with Clindamycin, closed square; MIC of Clindamycin combined with Carbapenems.

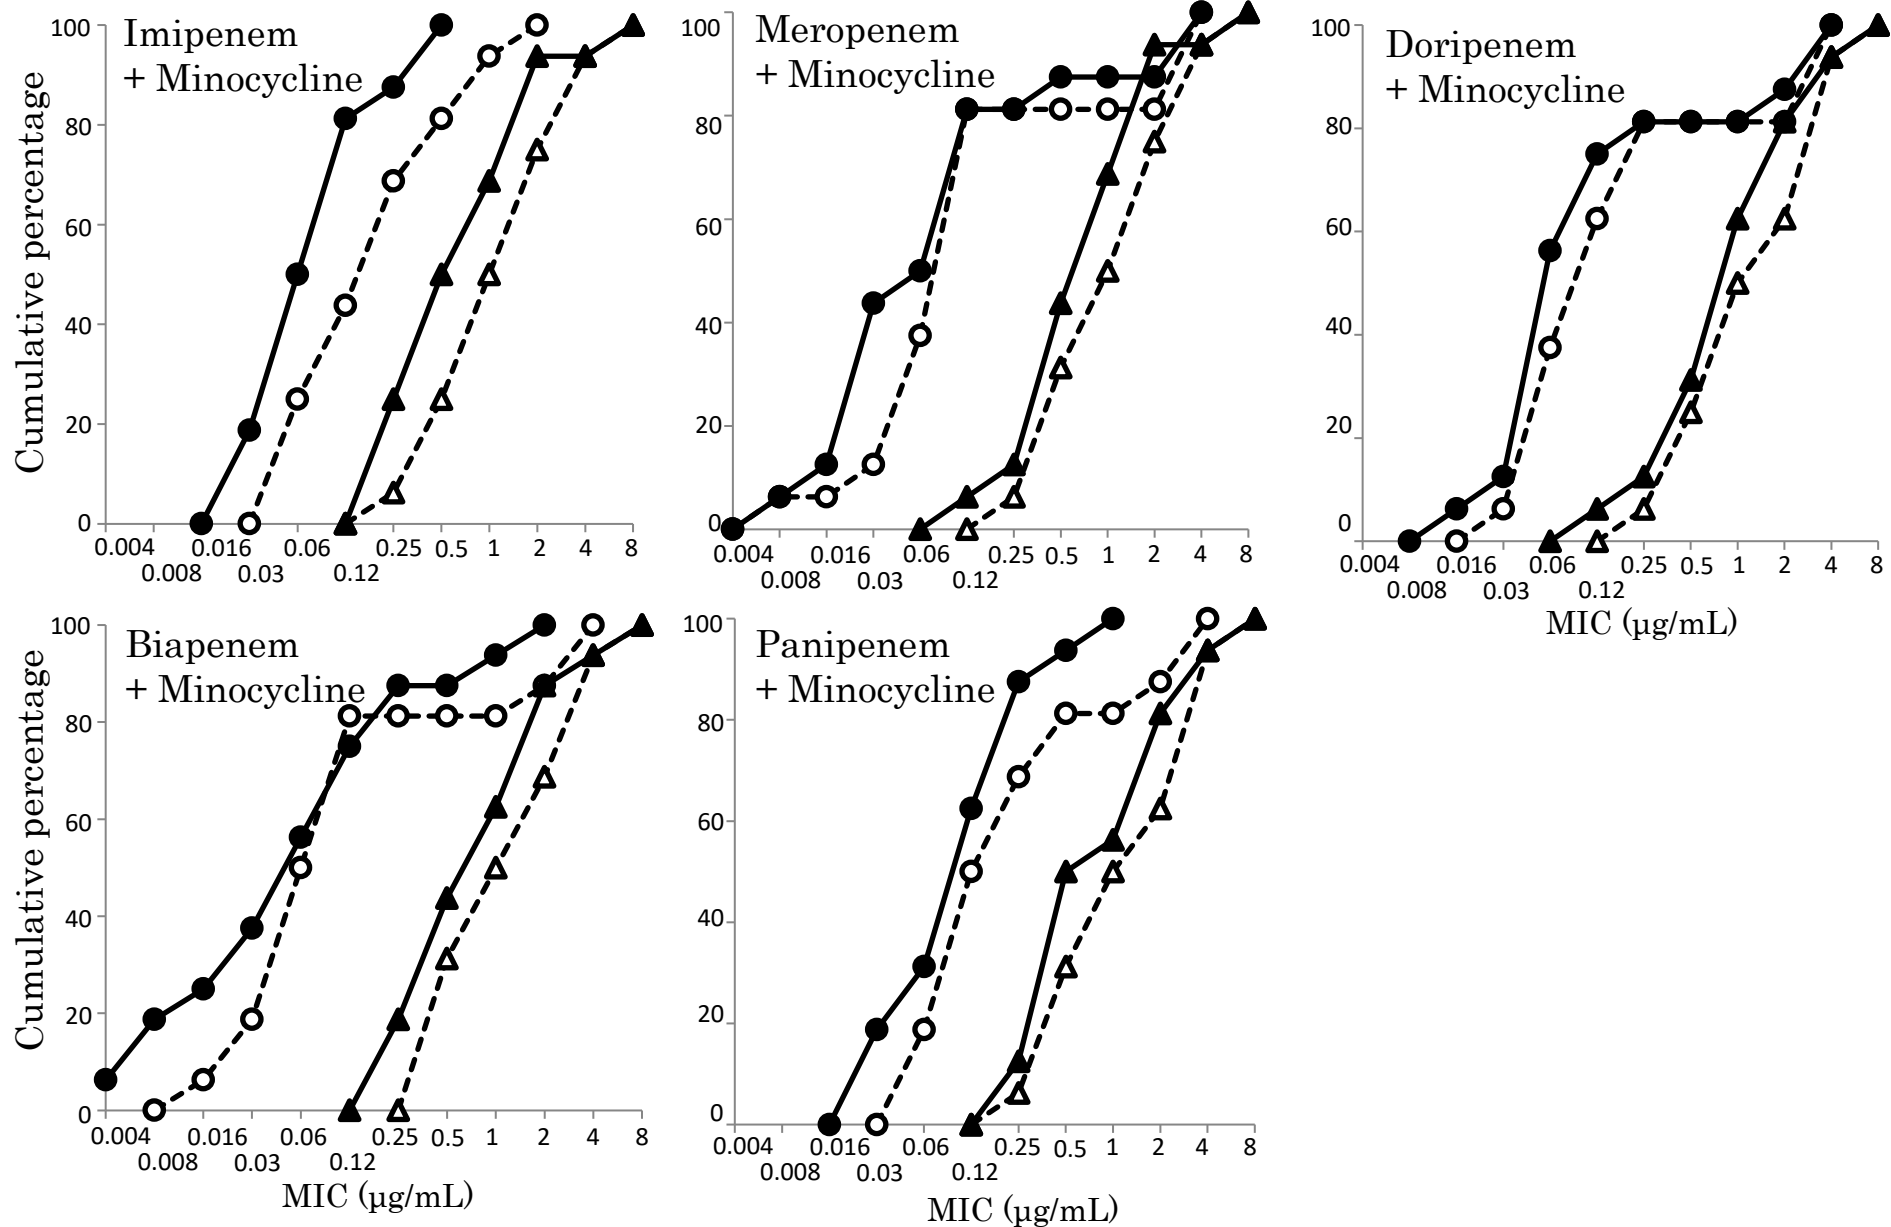

**Figure S2. (A) Antibacterial activity of Carbapenems, Minocycline and combination against *B. fragilis***

Open circle; MIC of Carbapenems, open triangle; MIC of Minocycline, closed circle; MIC of Carbapenems combined with Minocycline, closed triangle; MIC of Minocycline combined with Carbapenems.

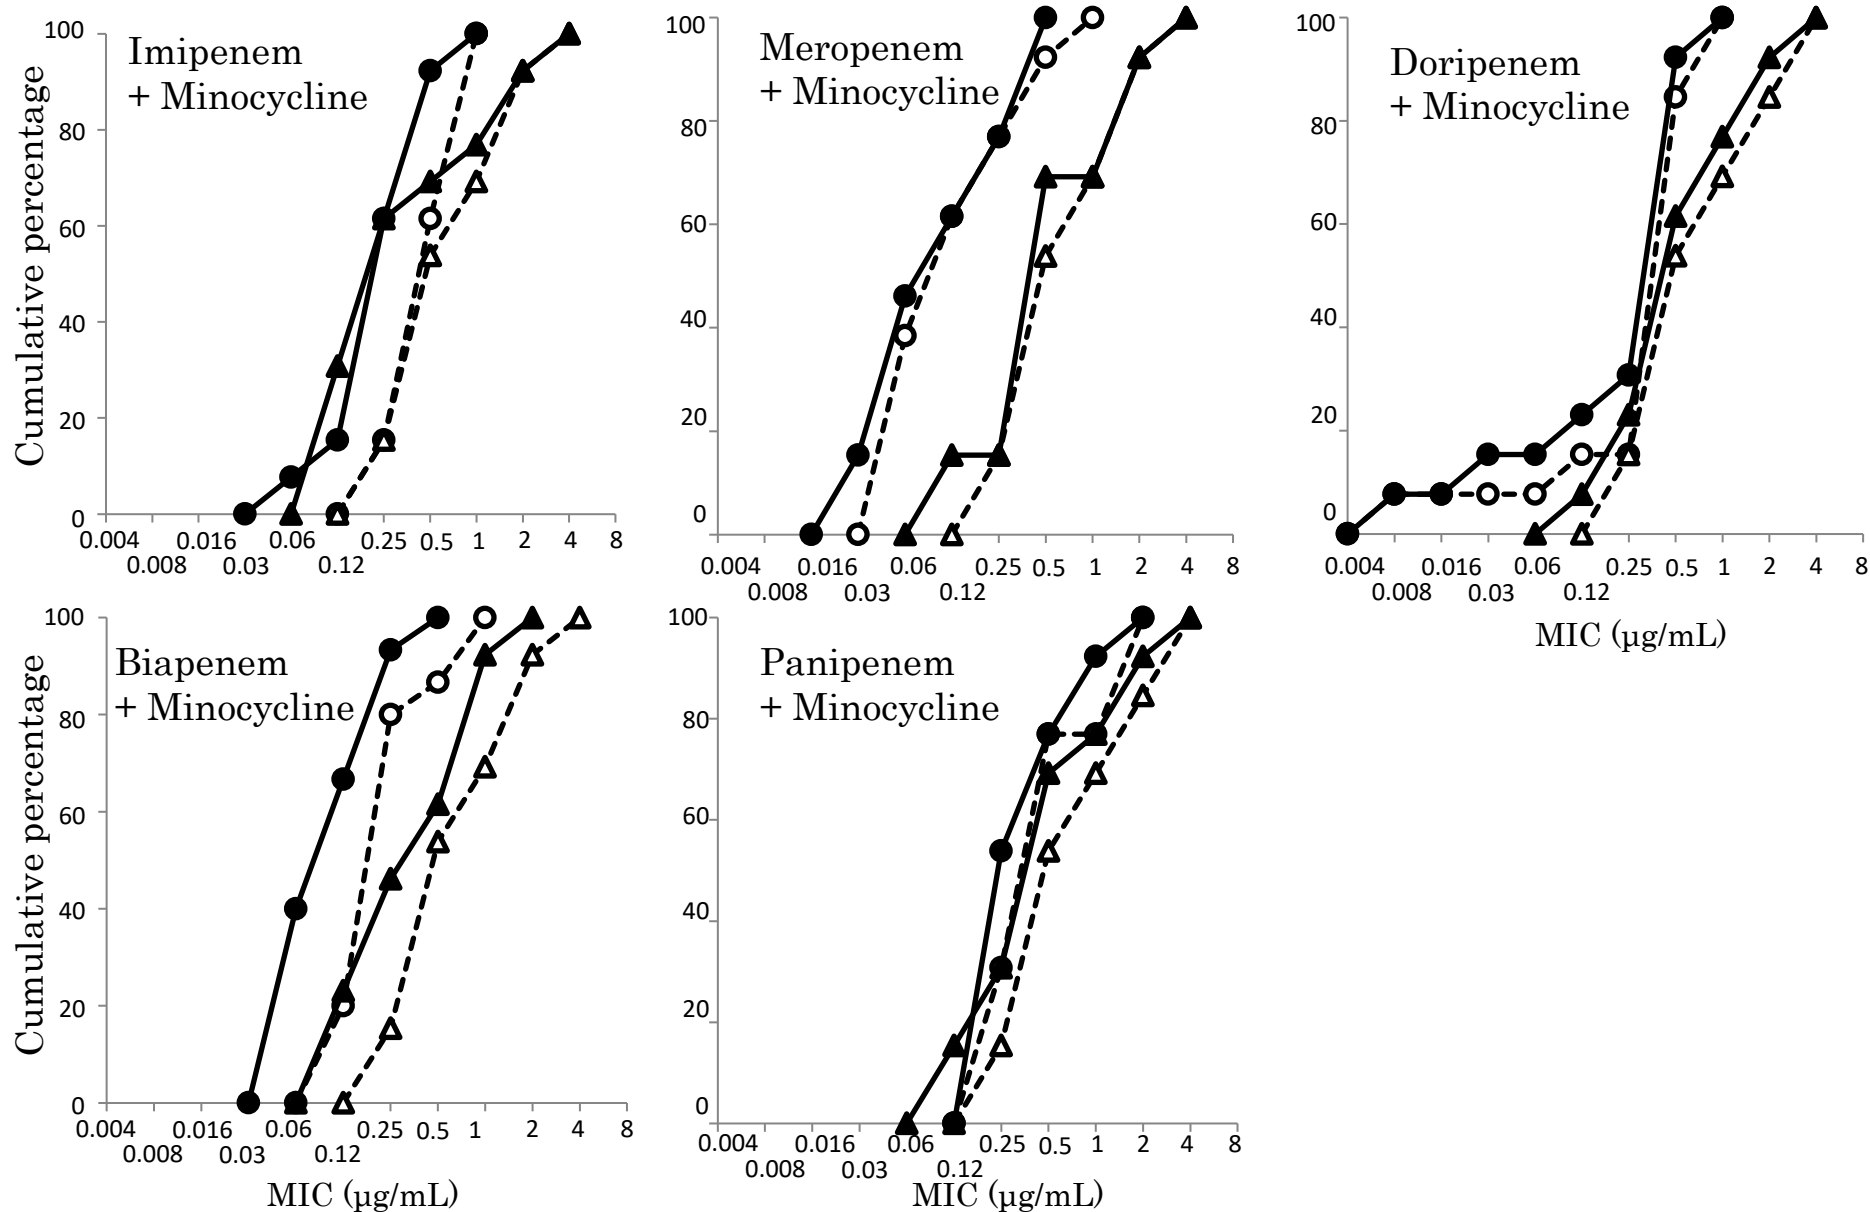

**Figure S2. (B) Antibacterial activity of Carbapenems, Minocycline and combination against *B.thetaiotaomicron***

Open circle; MIC of Carbapenems, open triangle; MIC of Minocycline, closed circle; MIC of Carbapenems combined with Minocycline, closed triangle; MIC of Minocycline combined with Carbapenems.

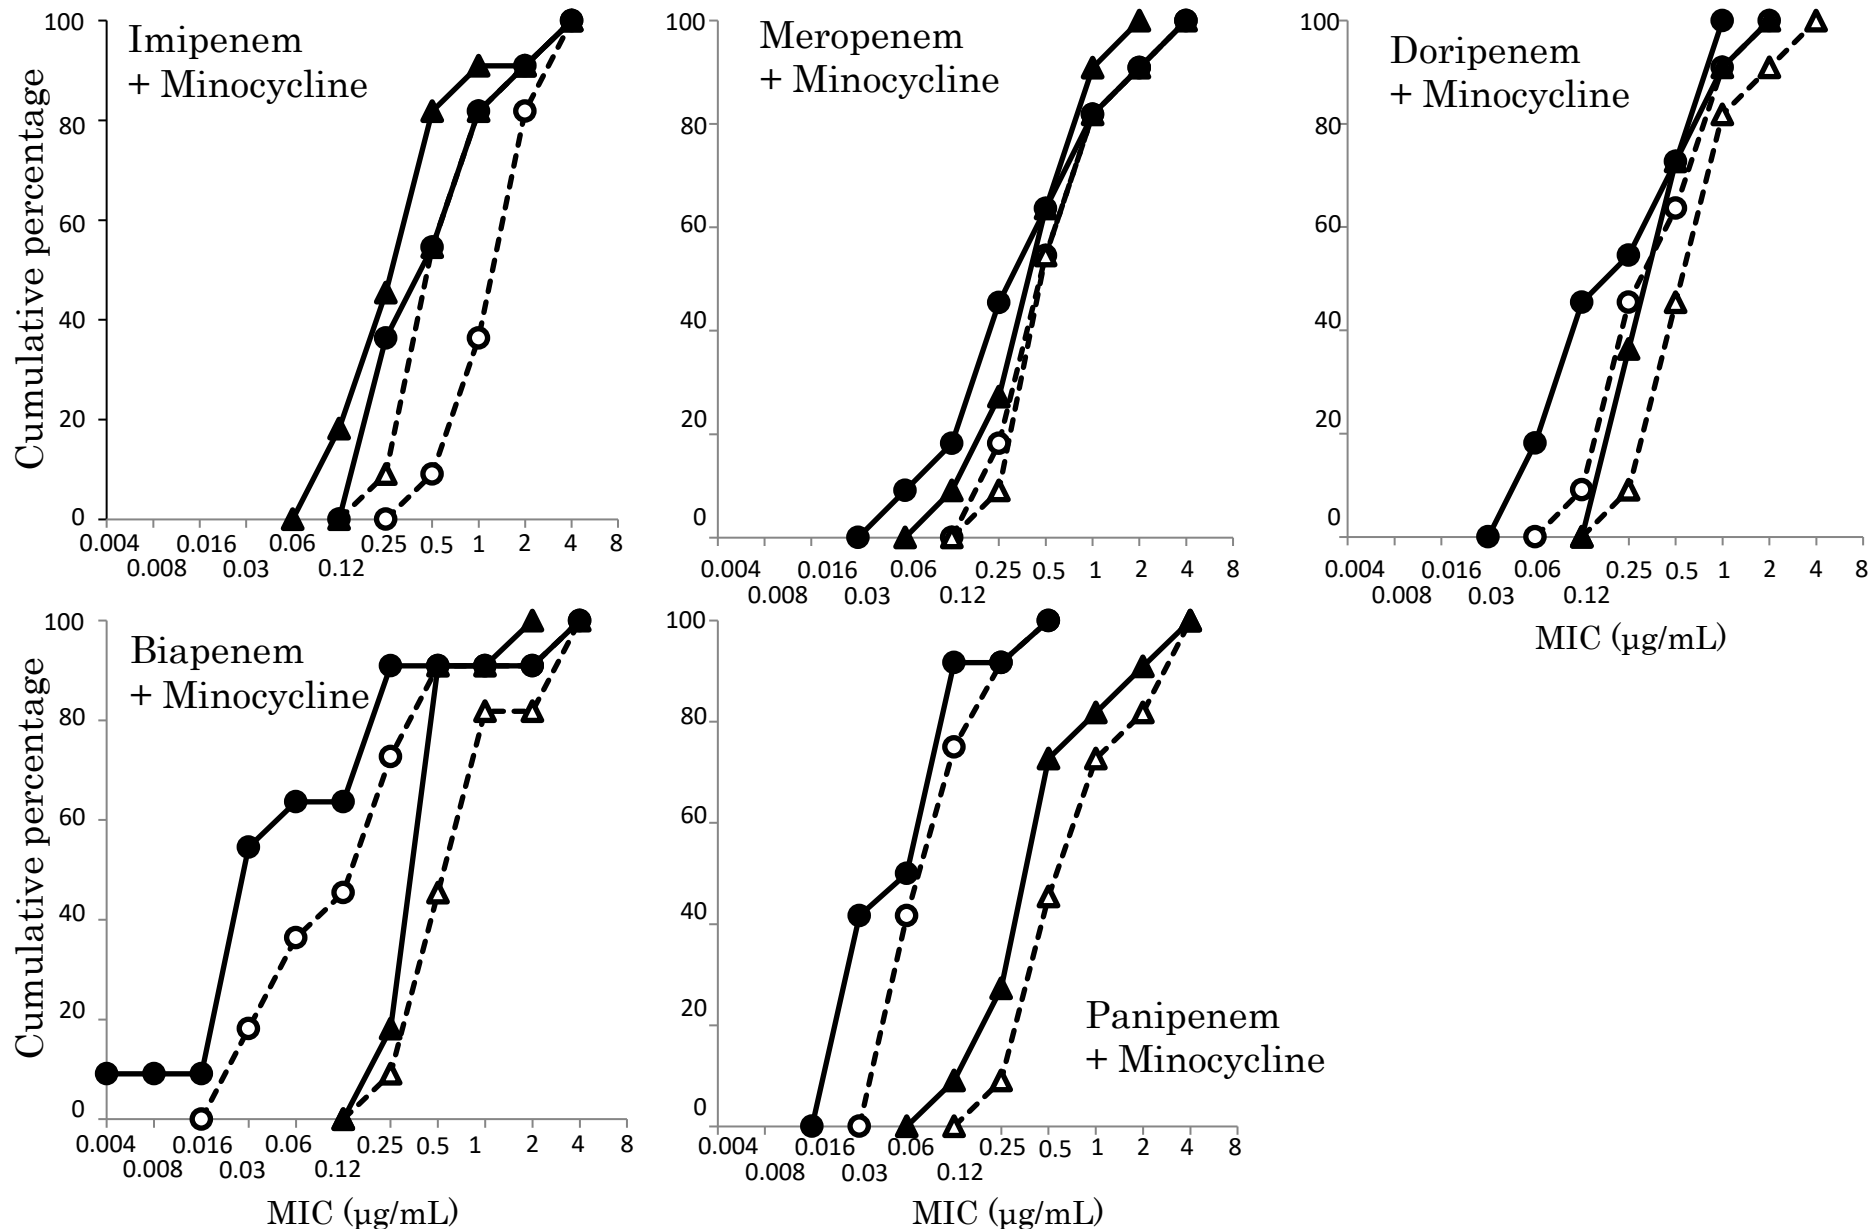

**Figure S2. (C) Antibacterial activity of Carbapenems, Minocycline and combination against *B. distasonis***

Open circle; MIC of Carbapenems, open triangle; MIC of Minocycline, closed circle; MIC of Carbapenems combined with Minocycline, closed triangle; MIC of Minocycline combined with Carbapenems.



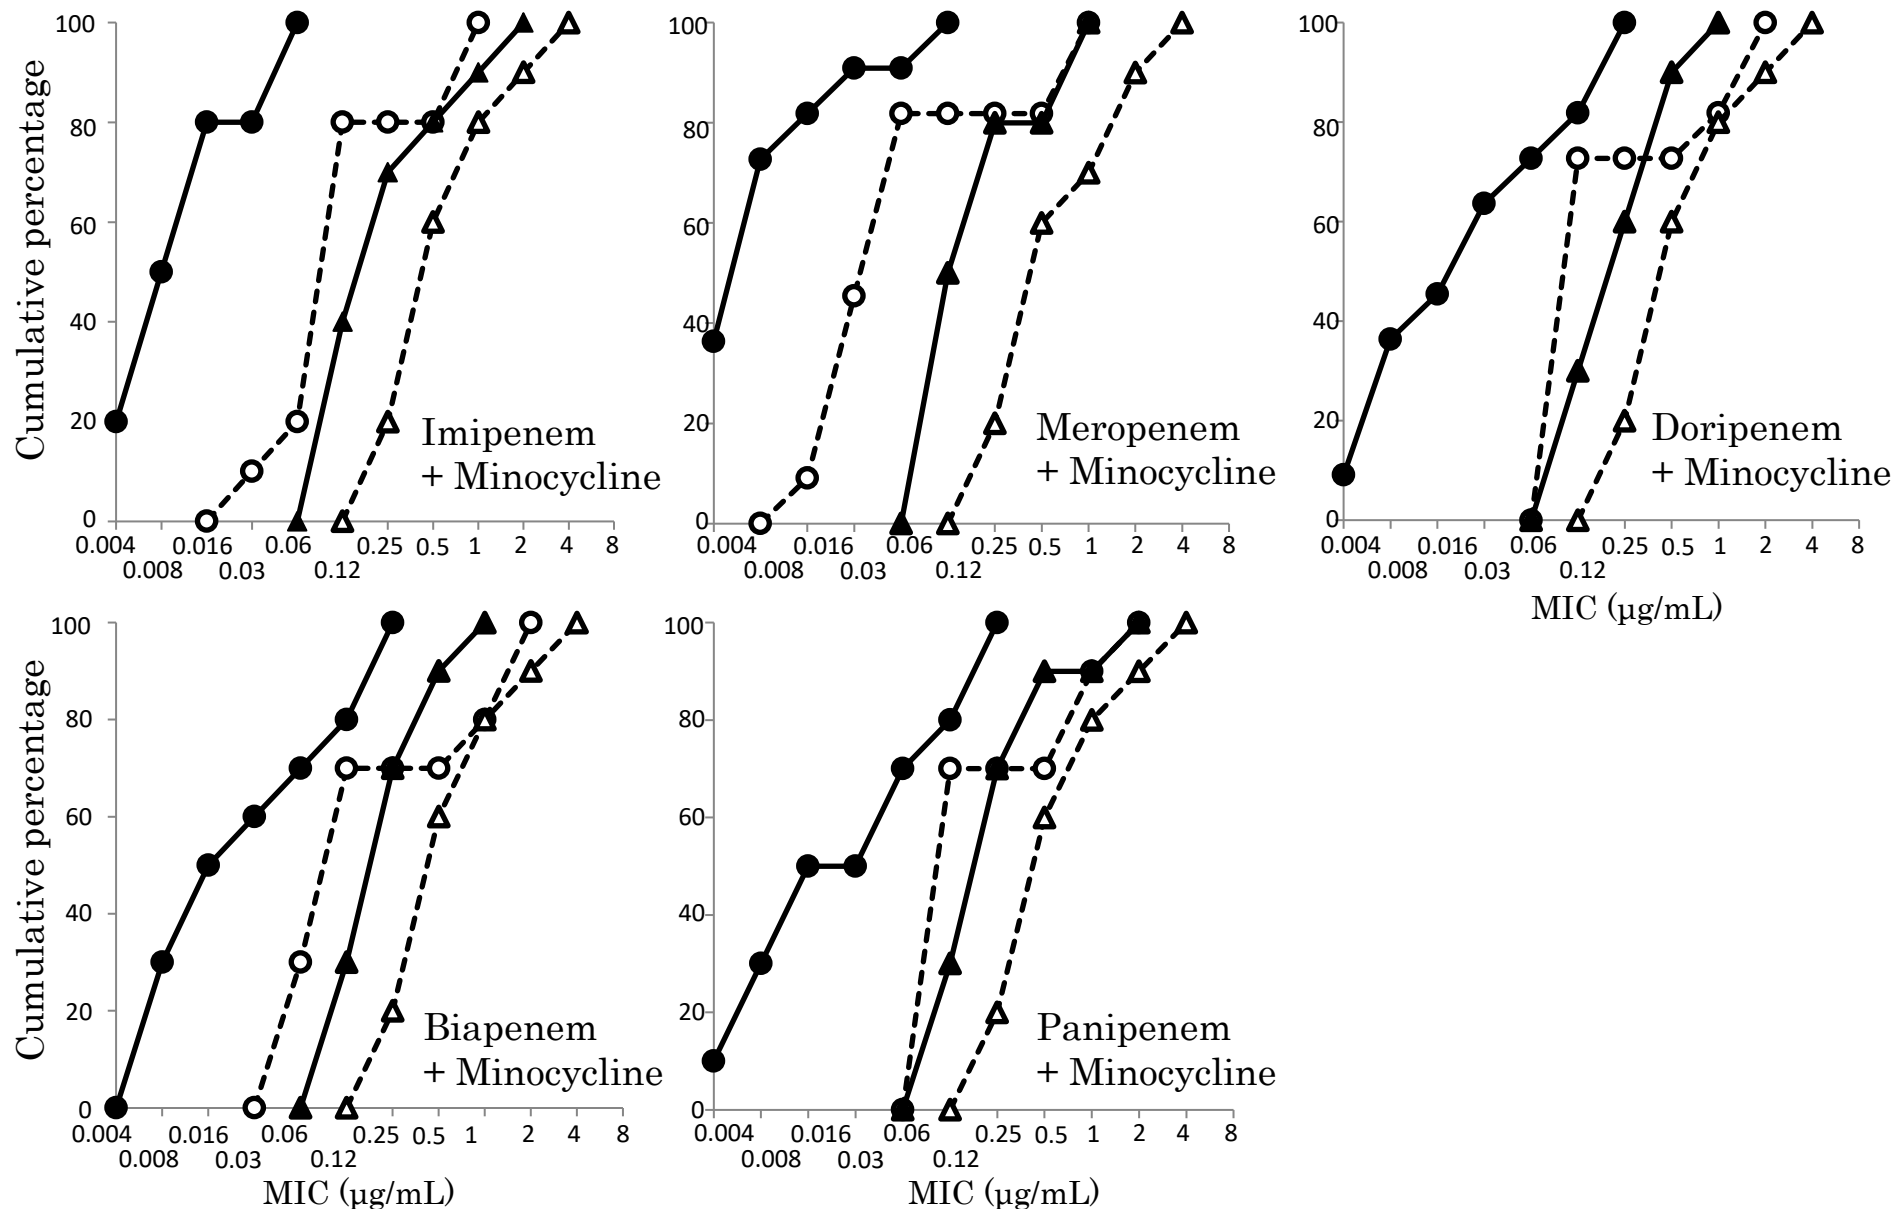

**Figure S2. (D) Antibacterial activity of Carbapenems, Minocycline and combination against *P. aerobius***

Open circle; MIC of Carbapenems, open triangle; MIC of Minocycline, closed circle; MIC of Carbapenems combined with Minocycline, closed triangle; MIC of Minocycline combined with Carbapenems.
